# Supplementary material
Source: Royal Society of Chemistry journal article supplement (doi:10.1039/d6ta01360k)
Supplement: d6ta01360k1.pdf [file d6ta01360k1.pdf]

## Supporting Information

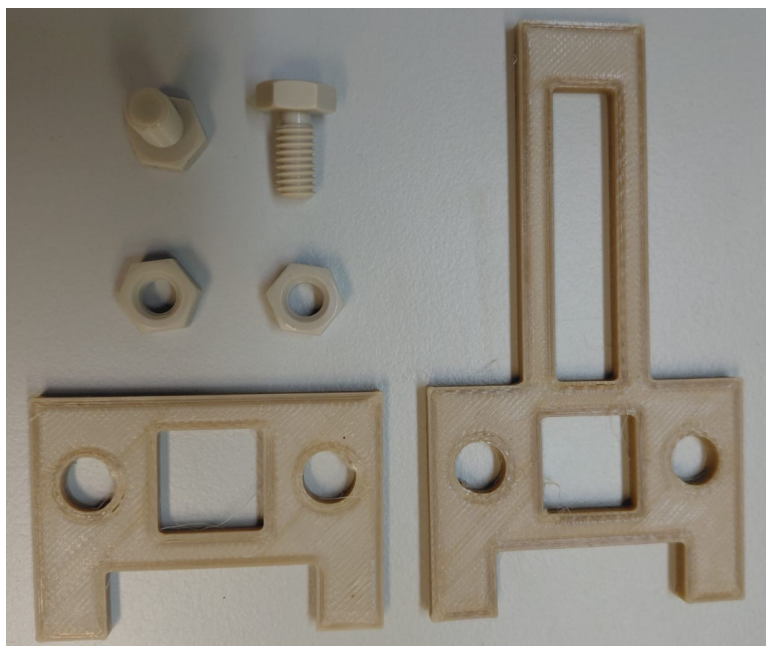

**Fig. S1** | Custom-made membrane holder produced from PEEK via 3D printing. The membrane is positioned between the two larger plates, with a central cutout providing direct exposure to the Fenton reagent. PEEK screws and nuts secure the assembly, ensuring stable fixation of the membrane during testing.

**Tab. S1** | Baseline membrane properties equivalent weight (EW) as provided by the supplier, ion exchange capacity (IEC) as calculated from the equivalent weight and the thickness of the pristine and 72 h degraded sample of the lsc- and ssc-PEM utilized in the accelerated stress test studies.

| Parameter                   | lsc-PEM                   | ssc-PEM                   |
|-----------------------------|---------------------------|---------------------------|
| EW* (g/equivalent)          | 1100 g eq <sup>-1</sup>   | 980 g eq <sup>-1</sup>    |
| IEC (in milliequivalents/g) | 0.909 meq g <sup>-1</sup> | 1.020 meq g <sup>-1</sup> |
| Thickness** (μm)            | Pristine: 199 μm          | Pristine: 104 μm          |
|                             | After 72 h: 190 μm        | After 72 h: 116 μm        |

\*provided by the supplier.

\*\*Thickness measured with foil thickness measuring tool (Käfer, Type 4 mm – 0.001 mm).

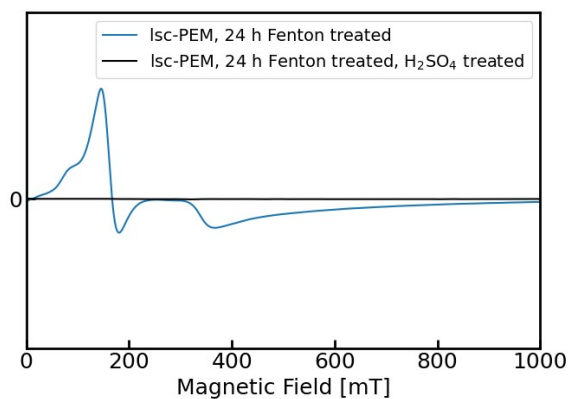

**Fig. S2** | Continuous wave EPR-spectra of a Isc-PEM membrane after 24 h of Fenton treatment time (blue) and of the same sample after the post-treatment with 0.5 M  $H_2SO_4$  (black).

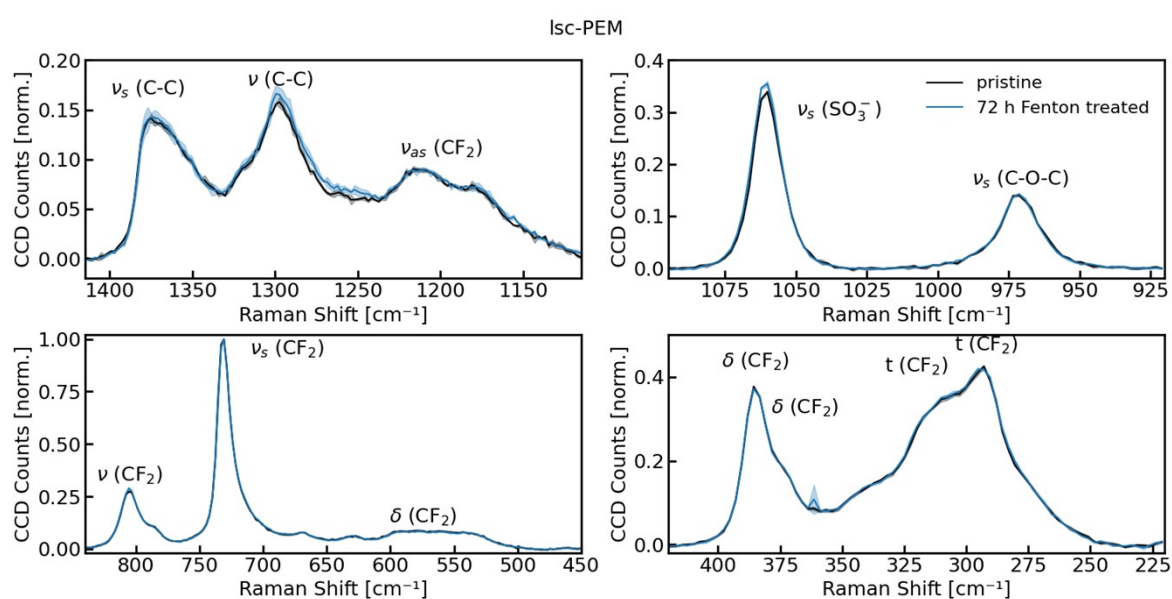

**Fig. S3** | Normalized Raman spectra in the 225–1400  $cm^{-1}$  range for a pristine and a 72 h Fenton treated Isc-PEM. Each spectrum was normalized to the  $\nu_s(CF_2)$  symmetric-stretching band at 730  $cm^{-1}$ . All symmetric-stretching vibration bands ( $\nu_s$ ), antisymmetric-stretching vibration bands ( $\nu_{as}$ ), twisting vibration bands ( $\tau$ ), and deformation vibration bands ( $\delta$ ) are indicated.

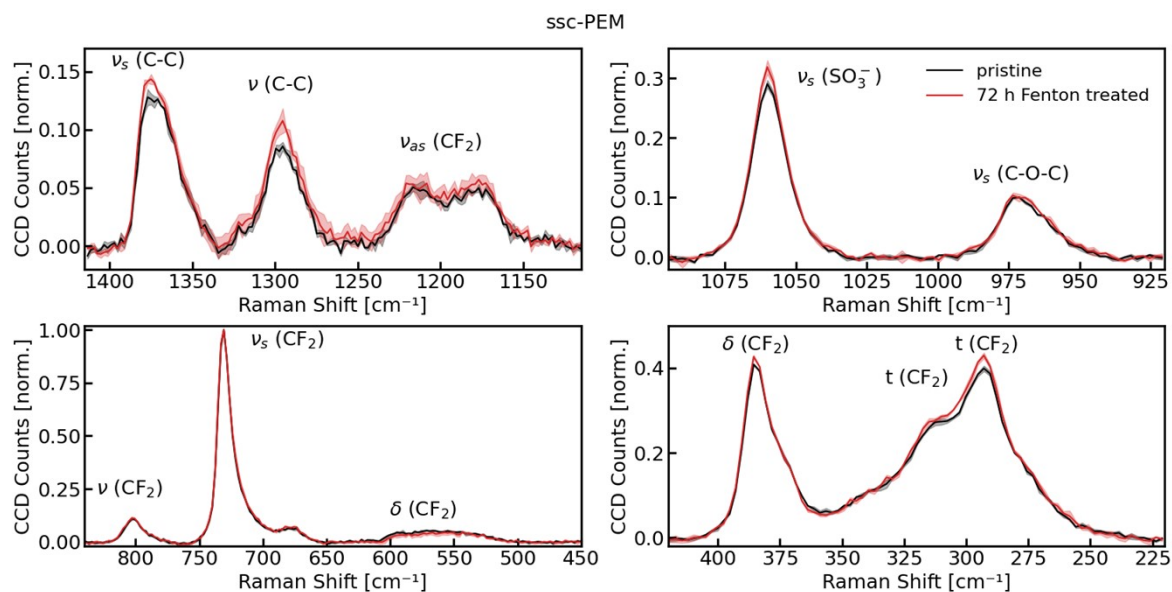

**Fig. S4** | Normalized Raman spectra in the 225–1400  $\text{cm}^{-1}$  range for a pristine and a 72 h Fenton treated ssc-PEM, with each spectrum normalized to the  $\nu_s(\text{CF}_2)$  symmetric-stretching band at 730  $\text{cm}^{-1}$ . All symmetric-stretching vibration bands ( $\nu_s$ ), antisymmetric-stretching vibration bands ( $\nu_{as}$ ), twisting vibration bands ( $\tau$ ), and deformation vibration bands ( $\delta$ ) are indicated.

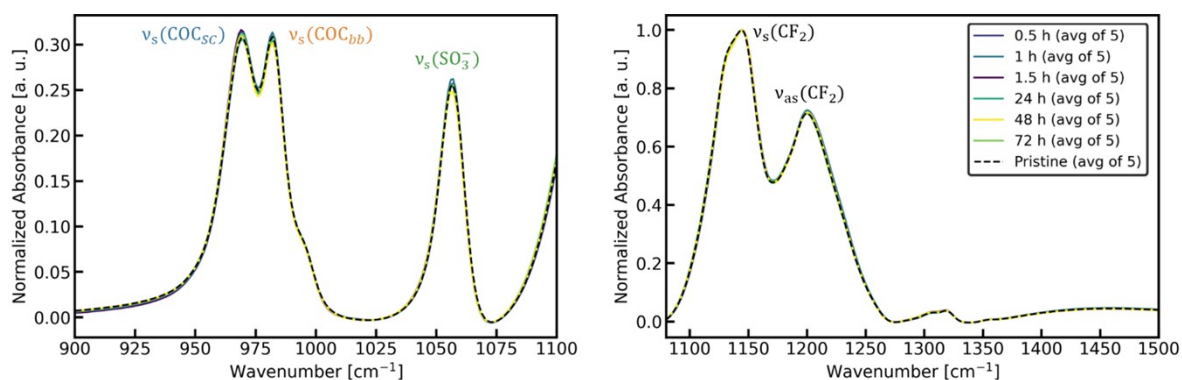

**Fig. S5** | Averaged, normalized ATR-IR spectra of Nafion in the 900–1350  $\text{cm}^{-1}$  range for pristine and Fenton treated Isc-PEMs (0.5, 1, 6, 24, 48, 72 h). Each spectrum represents the average of five measurements and was normalized to the  $\nu_s(\text{CF}_2)$  symmetric-stretching band at 1143  $\text{cm}^{-1}$ . Side chain vibrational bands at 969  $\text{cm}^{-1}$  ( $\text{COC}$  symmetric-stretch), 982  $\text{cm}^{-1}$  (Isc-PEM-specific  $\text{COC}$  symmetric-stretch), and 1056  $\text{cm}^{-1}$  ( $\text{SO}_3^-$  symmetric-stretch) are indicated.

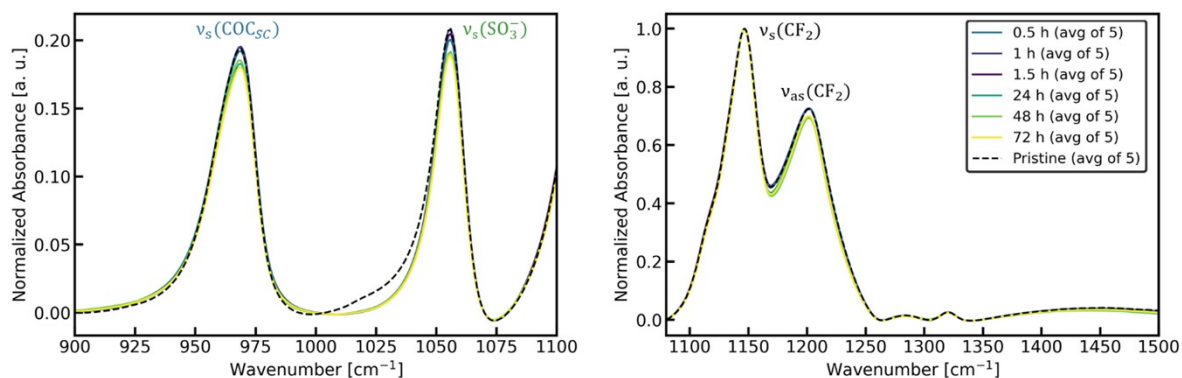

**Fig. S6** | Averaged, normalized ATR-IR spectra of Nafion in the 900–1350  $\text{cm}^{-1}$  range for pristine and Fenton treated ssc-PEMs (0.5, 1, 6, 24, 48, 72 h). Each spectrum represents the average of five measurements and was normalized to the  $\nu_s(\text{CF}_2)$  symmetric-stretching band at 1143  $\text{cm}^{-1}$ . Side chain vibrational bands at 969  $\text{cm}^{-1}$  ( $\text{COC}$  symmetric-stretch) and 1056  $\text{cm}^{-1}$  ( $\text{SO}_3^-$  symmetric-stretch) are highlighted.

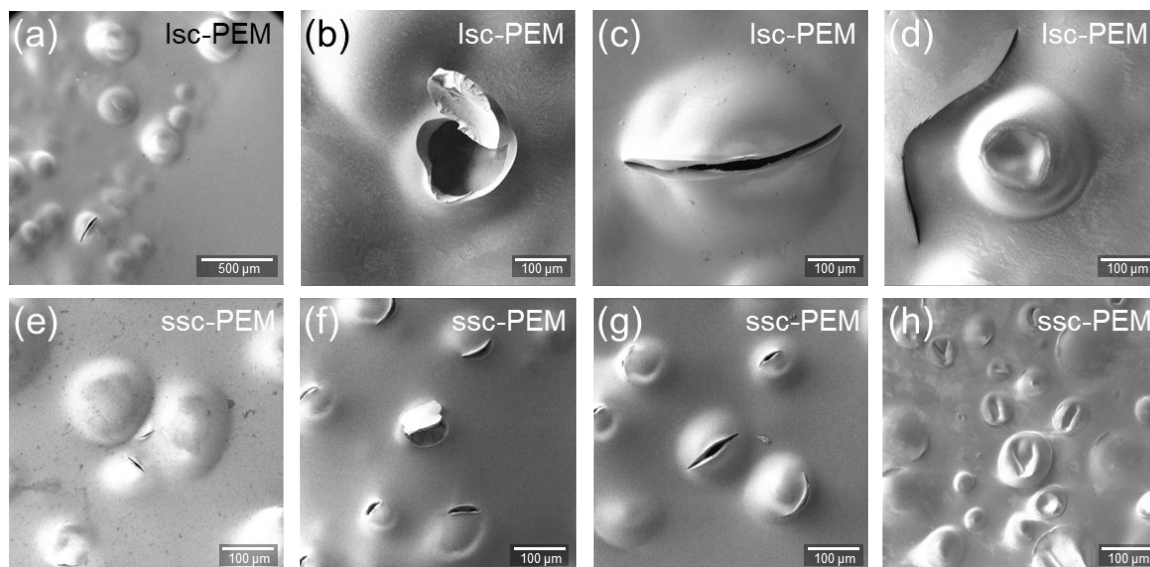

**Fig. S7** | SEM images showing representative surface morphologies formed on Isc-PEM (a–d) and ssc-PEM (e–h) after Fenton treatment. Four characteristic features are observed in both membrane types: intact rounded blisters (a, e), burst-cap blisters (b, f), slit-like tears (c, g), and collapsed “volcano” structures (d, h). These features appear in increasing numbers with longer exposure, reflecting progressive blistering and surface deterioration.

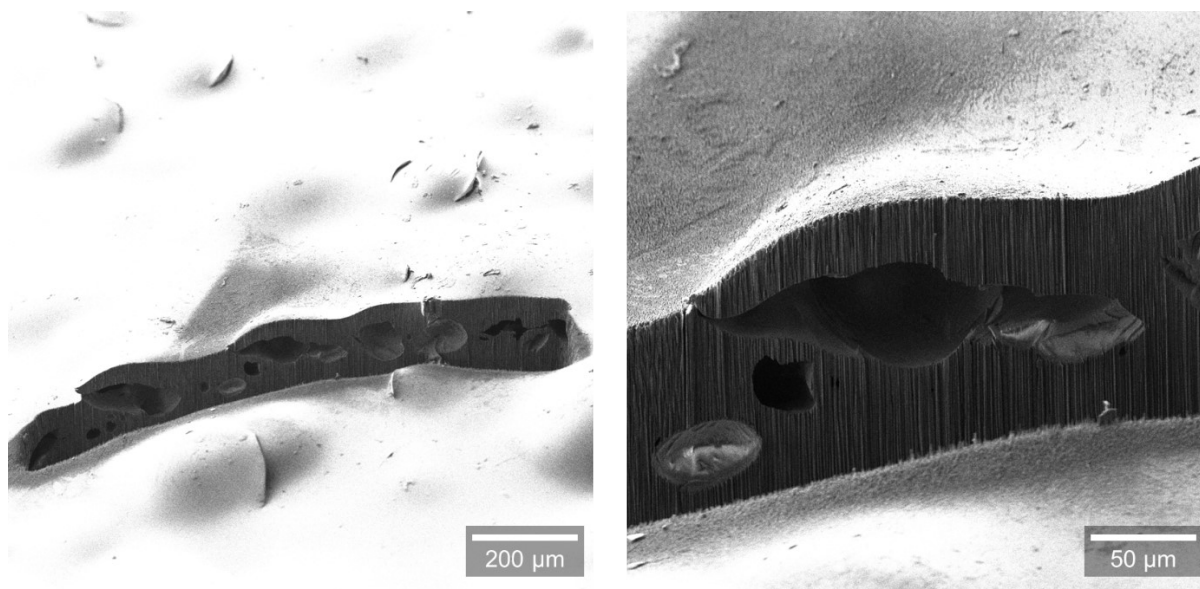

**Fig. S8** | Cross-sectional SEM images of Isc-PEM after 24 h of Fenton treatment, showing voids beneath surface protrusions.

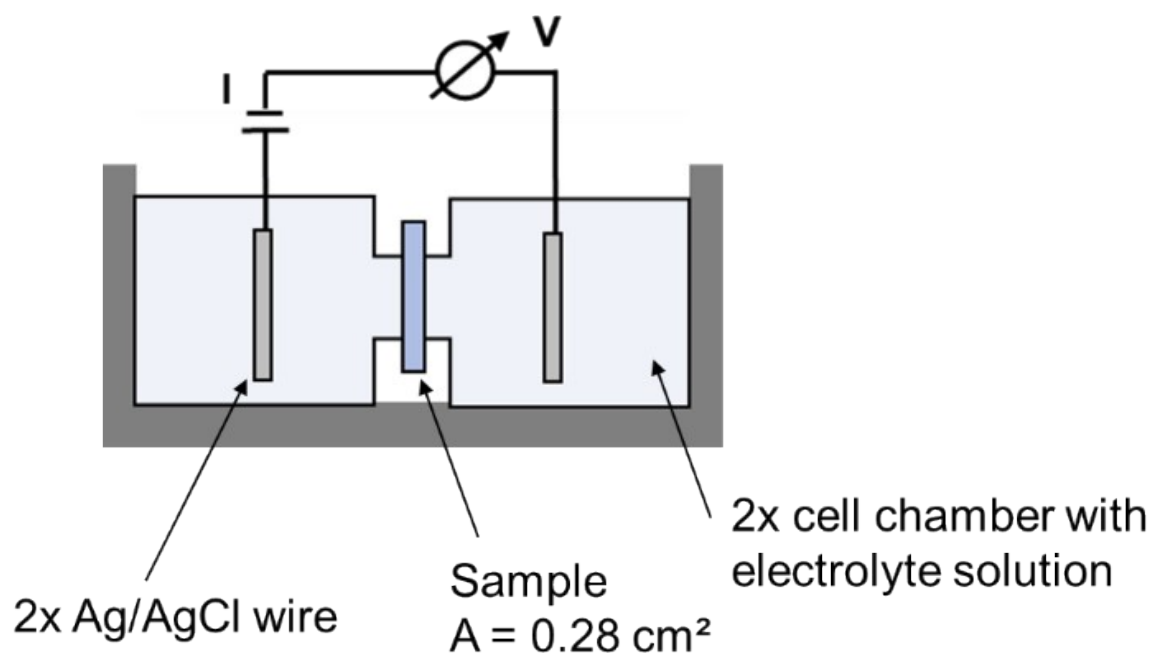

**Fig. S9** | Schematic illustration of the electrochemical cell used for I–V measurements. The membrane is fixed between two cell compartments, and the transmembrane ion current is measured at a 0.28 cm<sup>2</sup> sample area exposed to 100 mM  $H_2SO_4$  electrolyte solution.

**Table S2** | Characterization techniques applied to Fenton treated proton exchange membranes (PEMs), the type of structural or chemical insight provided, and the corresponding observations reported in the literature.

| Technique                                                                  | General Insight                                                             | Observations in Fenton Treated Membranes                                                                                                                                       |
|----------------------------------------------------------------------------|-----------------------------------------------------------------------------|--------------------------------------------------------------------------------------------------------------------------------------------------------------------------------|
| NMR ( <sup>19</sup> F MAS, <sup>13</sup> C solid-state and solution-state) | Molecular-level insight into main chain vs. side chain degradation pathways | Dissensus in literature on selective side-chain degradation with intact backbone <sup>31,37</sup> versus concurrent degradation of both under prolonged exposure <sup>35</sup> |
| ATR-FTIR                                                                   | Probes specific bond vibrations (e.g., C–F, C–O–C, SO <sub>3</sub> )        | Conflicting literature results: preferential side chain degradation <sup>39,40</sup> versus insignificant spectral changes <sup>32,41,42</sup>                                 |
| SEM                                                                        | Visualizes surface and internal                                             | Consistent report on surface                                                                                                                                                   |

---

morphology

roughening, void  
formation, and  
pinhole  
development  
indicative of  
severe  
morphological  
degradation<sup>32,39,43</sup>

-45

---

Superscript numbers indicate literature sources cited in the introduction.

**Table S3** | SAXS/WAXS features observed in pristine lsc-PEM and ssc-PEM membranes.

| Peak name    | Correlates to                                 | lsc-PEM                   |                               | ssc-PEM                   |                               |
|--------------|-----------------------------------------------|---------------------------|-------------------------------|---------------------------|-------------------------------|
|              |                                               | $q$ [ $\text{\AA}^{-1}$ ] | $d$ -spacing [ $\text{\AA}$ ] | $q$ [ $\text{\AA}^{-1}$ ] | $d$ -spacing [ $\text{\AA}$ ] |
| Matrix knee  | intercrystalline distance <sup>61,68</sup>    | 0.058                     | 108                           | 0.056                     | 112                           |
| Ionomer peak | hydrophilic $d$ -spacing <sup>61,68</sup>     | 0.22                      | 28.6                          | 0.27                      | 23.3                          |
| WAXS 1       | intermolecular chain spacing <sup>68,69</sup> | 1.20                      | 5.2                           | 1.20                      | 5.2                           |
| WAXS 2       | intramolecular distances <sup>69</sup>        | 2.75                      | 2.3                           | 2.75                      | 2.3                           |

The table lists the main peaks in the low- $q$ , intermediate- $q$ , and high- $q$  regions and their corresponding structural correlations.

**Table S4** | Summary of changes in SAXS features for lsc-PEM and ssc-PEM after Fenton treatment.

| Membrane         | Observation                                                           | Correlates to                               | $q$ [ $\text{\AA}^{-1}$ ] | $d$ -spacing [ $\text{\AA}$ ] |
|------------------|-----------------------------------------------------------------------|---------------------------------------------|---------------------------|-------------------------------|
| lsc-PEM          | Shift of Ionomer peak                                                 | Hydrophilic-domain spacing <sup>61,68</sup> | 0.22 $\rightarrow$ 0.24   | 28.6 $\rightarrow$ 26.2       |
| ssc-PEM          | Evolving low- $q$ upturn at $\sim 0.003 \text{\AA}^{-1}$ (30, 90 min) | Polymeric aggregates <sup>69</sup>          | $\sim 0.003$              | $\sim 2100$                   |
| lsc-/<br>ssc-PEM | Decreasing matrix knee intensity                                      | intercrystalline distance <sup>61,68</sup>  | $\sim 0.05$               | $\sim 110$                    |

The table highlights shifts in ionomer peaks, variations in low- $q$  scattering, and attenuation of the matrix knee.

**Table S5** | Water contact angles ( $\vartheta$ ) of pristine and Fenton treated lsc-PEM and ssc-PEM.

| Membrane | Fenton Treatment [h] | Contact Angle, $\vartheta$ [°] | $\pm$ SD [°] |
|----------|----------------------|--------------------------------|--------------|
| lsc-PEM  | 0                    | 106.68                         | 2.49         |
|          | 1                    | 89.55                          | 3.67         |
|          | 6                    | 86.93                          | 6.93         |
| ssc-PEM  | 0                    | 94.78                          | 4.79         |
|          | 1                    | 82.87                          | 6.92         |
|          | 6                    | 93.76                          | 5.81         |

Data are reported as mean  $\pm$  standard deviation (SD).

**Table S6** | Adhesion forces ( $F$ ) for water droplets on pristine and Fenton treated lsc-PEM and ssc-PEM.

| Membrane | Fenton Treatment [h] | $F_{H_2O}$<br>[ $\mu\text{N mm}^{-2}$ ] | $\pm$ SD <sub>H<sub>2</sub>O</sub><br>[ $\mu\text{N mm}^{-2}$ ] |
|----------|----------------------|-----------------------------------------|-----------------------------------------------------------------|
| lsc-PEM  | 0                    | 197.89                                  | 1.15                                                            |
|          | 1                    | 239.06                                  | 6.96                                                            |
|          | 6                    | 240.95                                  | 2.18                                                            |
| ssc-PEM  | 0                    | 207.58                                  | 9.42                                                            |
|          | 1                    | 204.02                                  | 10.46                                                           |
|          | 6                    | 211.33                                  | 3.44                                                            |

Data are reported as mean  $\pm$  standard deviation (SD).
